# Supplementary material for: Integrated Multi-Omic Data Analysis and Validation with Yeast Model Show Oxidative Phosphorylation Modulate Protein Aggregation in Amyotrophic Lateral Sclerosis
Source: Research Square preprint supplement (doi:10.21203/rs.3.rs-870225/v1), 2021-09-07
Supplement: Supplementary file 1 [file 790ee71211b2ccb83674f138.pdf]

**Integrated Multi-Omic data analysis and validation with yeast model show oxidative phosphorylation modulate protein aggregation in Amyotrophic Lateral Sclerosis**

**Sai Swaroop R<sup>#, 1</sup>, Akhil PS <sup>#, 1, 2</sup>, Sai Sanwid Pradhan <sup>1</sup>, Bandana Prasad <sup>3</sup>, Raksha Rao K <sup>4</sup>, Meghana Manjunath<sup>4</sup>, Dr. Bibha Choudhary<sup>\*, 4</sup>, Venketesh Sivaramakrishnan<sup>\*, 1</sup>.**

<sup>1</sup> Disease Biology Lab, Dept. of Biosciences, Sri Sathya Sai Institute of Higher Learning, Prasanthi Nilayam, Anantapur, Andhra Pradesh, India - 515134

<sup>2</sup> Department of Chemistry, St. Paul's College, Kalamassery, Kerala, India-683503.

<sup>3</sup> Agilent Technology, Bengaluru, India.

<sup>4</sup> Institute of Bioinformatics and Applied Biotechnology, Bengaluru, Karnataka, India - 560100

#Both these authors contributed equally.

\*Authors of correspondence

**Venketesh Sivaramakrishnan:** [svenketesh@sssihl.edu.in](mailto:svenketesh@sssihl.edu.in)

**Bibha Choudhary:** [vibha@ibab.ac.in](mailto:vibha@ibab.ac.in)

**Key words:** Systems Analysis, ALS, SOD1, FUS, TDP-43, Transcriptomics, Oxidative Phosphorylation, Mitochondrial Dys-function

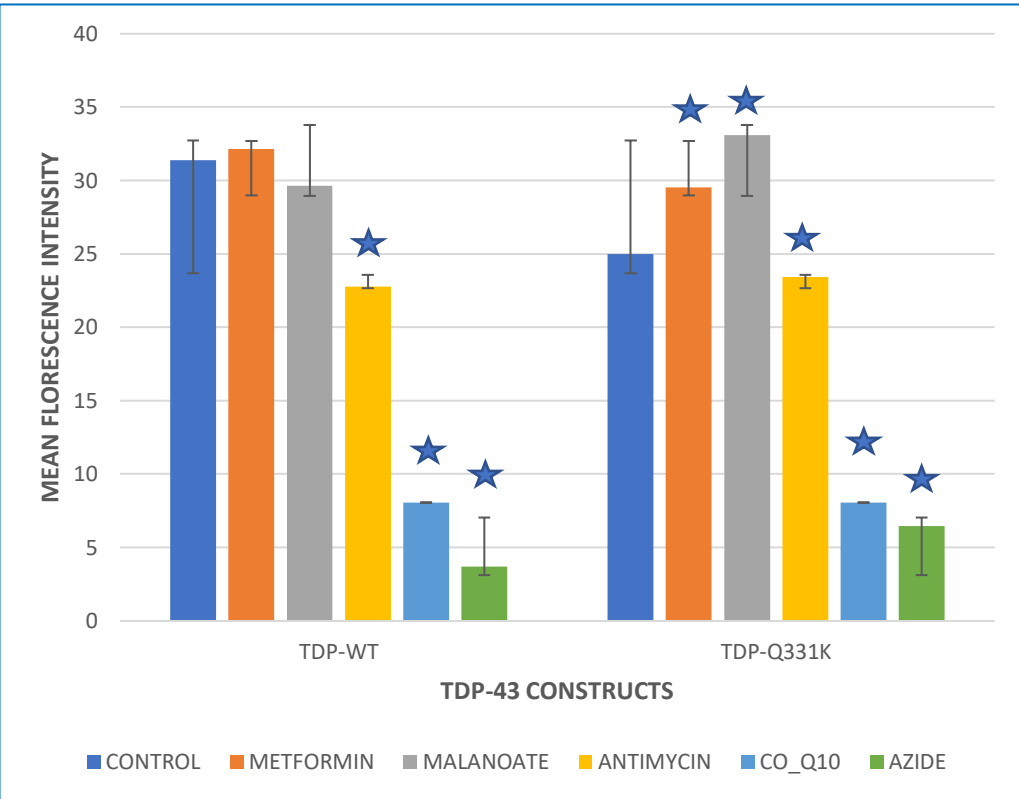

★ P-VALUE<0.05

| CONDITION                                            | TDP-WT-YFP                 |                        | TDP-Q331K-YFP              |                        |
|------------------------------------------------------|----------------------------|------------------------|----------------------------|------------------------|
|                                                      | MEAN FLORESCENCE INTENSITY | SIGNIFICANCE (P-VALUE) | MEAN FLORESCENCE INTENSITY | SIGNIFICANCE (P-VALUE) |
| CONTROL                                              | 31.390754                  |                        | 24.99937527                |                        |
| METFORMIN<br>(COMPLEX-I INHIBITOR)                   | 32.15759                   | 0.473164777            | 29.52789205                | 1.33175E-05            |
| MALANOATE<br>(COMPLEX-II INHIBITOR)                  | 29.651584                  | 0.146940429            | 33.07909776                | 9.14039E-05            |
| ANTIMYCIN<br>(COMPLEX-III INHIBITOR)                 | 22.785517                  | 5.06181E-06            | 23.43998771                | 0.009415651            |
| CO-ENZYME Q <sub>10</sub><br>(COMPLEX-III MODULATOR) | 8.0400624                  | 2.92105E-08            | 8.040062387                | 7.6214E-08             |
| AZIDE<br>(COMPLEX-IV INHIBITOR)                      | 3.6834153                  | 8.28004E-11            | 6.462695801                | 2.59137E-09            |

SUPPLEMENTARY FIGURE-2A: GRAPH REPRESENTING RESULTS OBTAINED FROM FLORESCENCE QUANTIFICATION OF TDP-43 TRANSFORMED YEAST CELLS TREATED WITH DIFFERENT MITOCHONDRIAL INHIBITORS.

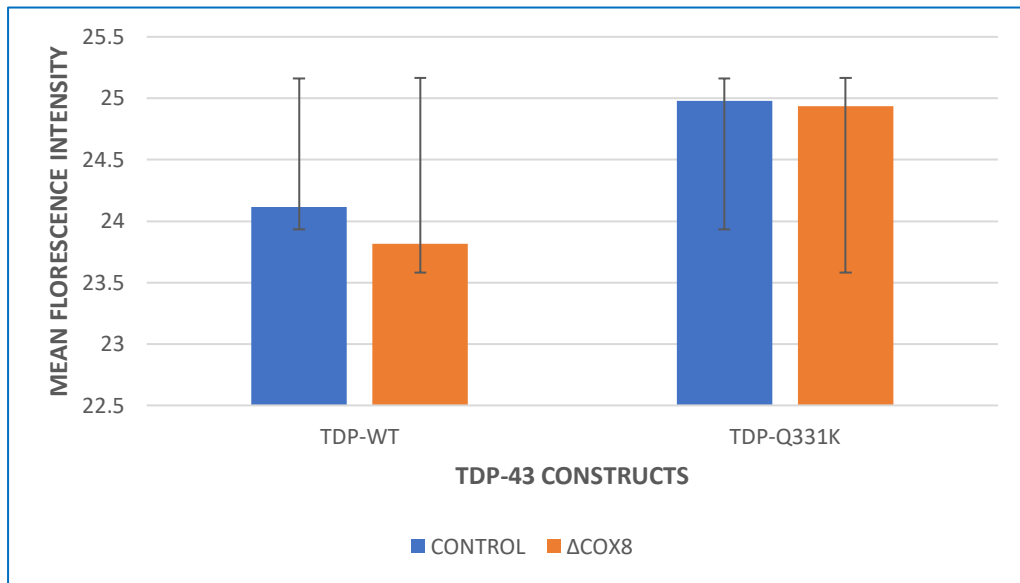

| CONDITION | TDP-WT-YFP                 |                        | TDP-Q331K-YFP              |                        |
|-----------|----------------------------|------------------------|----------------------------|------------------------|
|           | MEAN FLORESCENCE INTENSITY | SIGNIFICANCE (P-VALUE) | MEAN FLORESCENCE INTENSITY | SIGNIFICANCE (P-VALUE) |
| CONTROL   | 24.11395013                |                        | 24.98033669                |                        |
| ΔCOX8     | 23.81352833                | 0.747454               | 24.93348764                | 0.939422               |

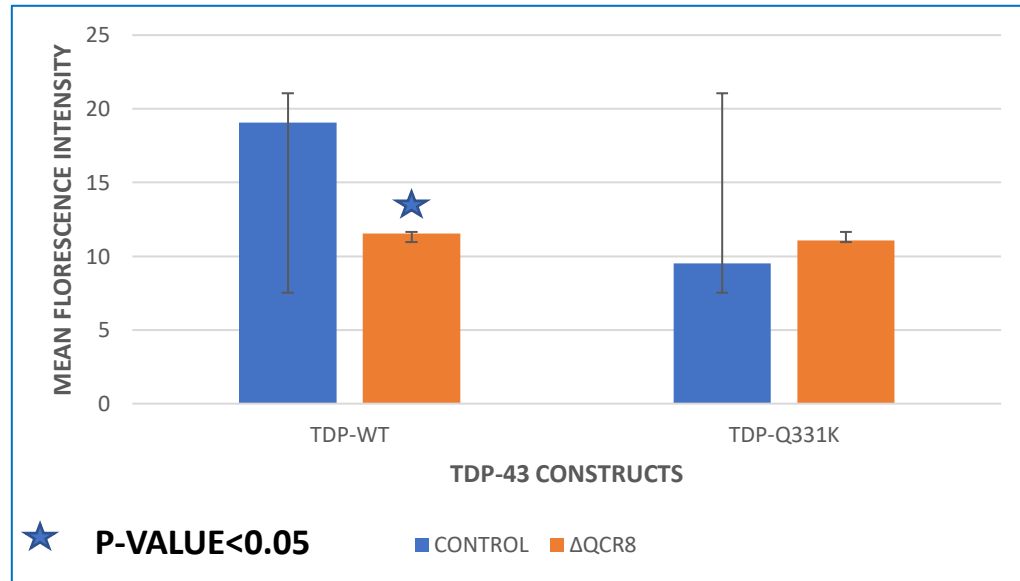

| CONDITION | TDP-WT-YFP                 |                        | TDP-Q331K-YFP              |                        |
|-----------|----------------------------|------------------------|----------------------------|------------------------|
|           | MEAN FLORESCENCE INTENSITY | SIGNIFICANCE (P-VALUE) | MEAN FLORESCENCE INTENSITY | SIGNIFICANCE (P-VALUE) |
| CONTROL   | 19.08494                   |                        | 9.52045                    |                        |
| ΔQCR8     | 11.5587                    | 0.007299               | 11.06827                   | 0.487024               |

**SUPPLEMENTARY FIGURE-2B:** GRAPHS REPRESENTING RESULTS OBTAINED FROM FLORESCENCE QUANTIFICATION OF TDP-43 TRANSFORMED YEAST KNOCK-OUTS OF COX8 AND QCR8.

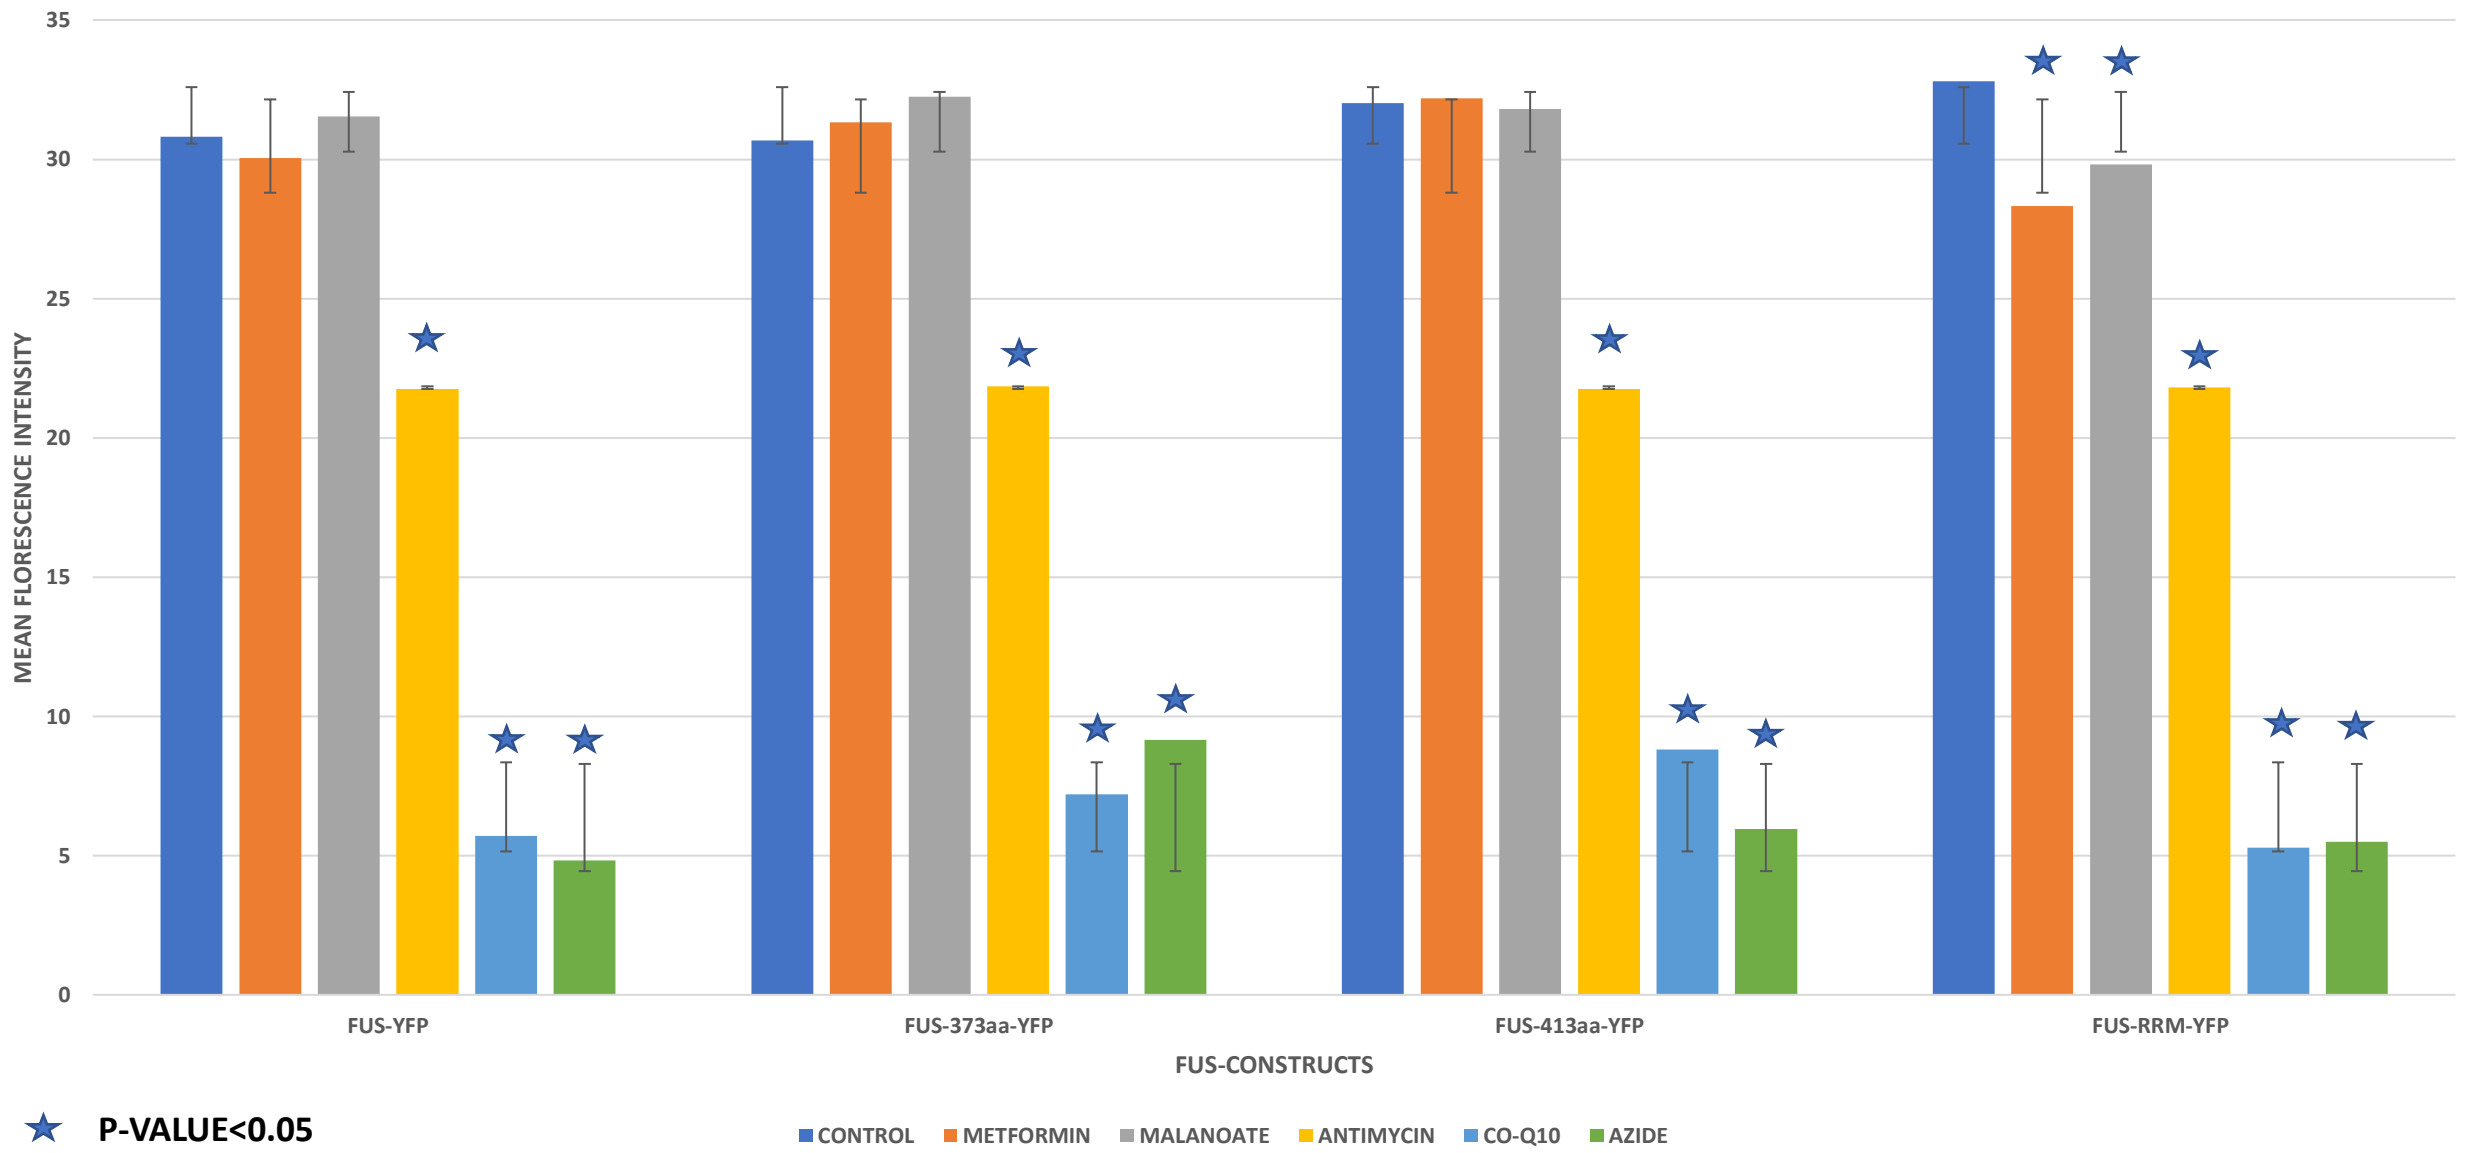

**SUPPLEMENTARY FIGURE-2C:** GRAPH REPRESENTING RESULTS OBTAINED FROM FLORESCENCE QUANTIFICATION OF FUS TRANSFORMED YEAST CELLS TREATED WITH DIFFERENT MITOCHONDRIAL INHIBITORS.

| CONDITION                                            | FUS-YFP                    |                        | FUS-373aa-YFP              |                        | FUS-413aa-YFP              |                        | FUS-RRM-YFP                |                        |
|------------------------------------------------------|----------------------------|------------------------|----------------------------|------------------------|----------------------------|------------------------|----------------------------|------------------------|
|                                                      | MEAN FLORESCENCE INTENSITY | SIGNIFICANCE (P-VALUE) |
| CONTROL                                              | 30.80894028                |                        | 30.68367544                |                        | 32.02187357                |                        | 32.80759026                |                        |
| METFORMIN<br>(COMPLEX-I INHIBITOR)                   | 30.04716245                | 0.667857356            | 31.33050623                | 0.749411719            | 32.20069529                | 0.831349798            | 28.33162029                | 0.004535833            |
| MALANOATE<br>(COMPLEX-II INHIBITOR)                  | 31.53803457                | 0.751397756            | 32.25896932                | 0.427844224            | 31.8171661                 | 0.730686952            | 29.81050558                | 0.020781162            |
| ANTIMYCIN<br>(COMPLEX-III INHIBITOR)                 | 21.75765695                | 3.17953E-05            | 21.85716813                | 0.000139927            | 21.75807525                | 4.5769E-08             | 21.81850342                | 3.83468E-06            |
| CO-ENZYME Q <sub>10</sub><br>(COMPLEX-III MODULATOR) | 5.70342673                 | 6.731E-08              | 7.194835111                | 2.18976E-07            | 8.806479802                | 1.4776E-07             | 5.285956248                | 3.80501E-08            |
| AZIDE<br>(COMPLEX-IV INHIBITOR)                      | 4.831598448                | 1.38991E-08            | 9.1606332                  | 5.10418E-06            | 5.954019342                | 2.39987E-09            | 5.495334774                | 9.36801E-08            |

**SUPPLEMENTARY FIGURE-2D:** TABLE REPRESENTING RESULTS OBTAINED FROM FLORESCENCE QUANTIFICATION OF FUS TRANSFORMED YEAST CELLS TREATED WITH DIFFERENT MITOCHONDRIAL INHIBITORS.

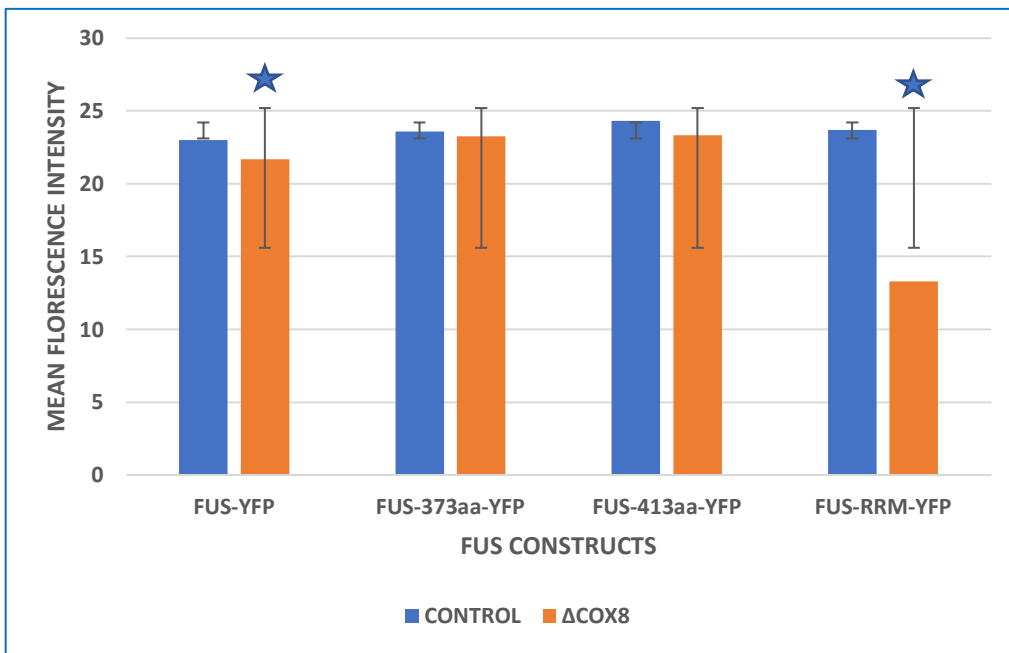

| CONDITION | FUS-YFP                    |                        | FUS-373aa-YFP              |                        | FUS-413aa-YFP              |                        | FUS-RRM-YFP                |                        |
|-----------|----------------------------|------------------------|----------------------------|------------------------|----------------------------|------------------------|----------------------------|------------------------|
|           | MEAN FLORESCENCE INTENSITY | SIGNIFICANCE (P-VALUE) |
| CONTROL   | 22.98053934                |                        | 23.59071948                |                        | 24.3247818                 |                        | 23.7040334                 |                        |
| ΔCOX8     | 22.98053934                | 0.001478902            | 23.59071948                | 0.50320515             | 24.3247818                 | 0.13499719             | 23.7040334                 | 6.38765E-05            |

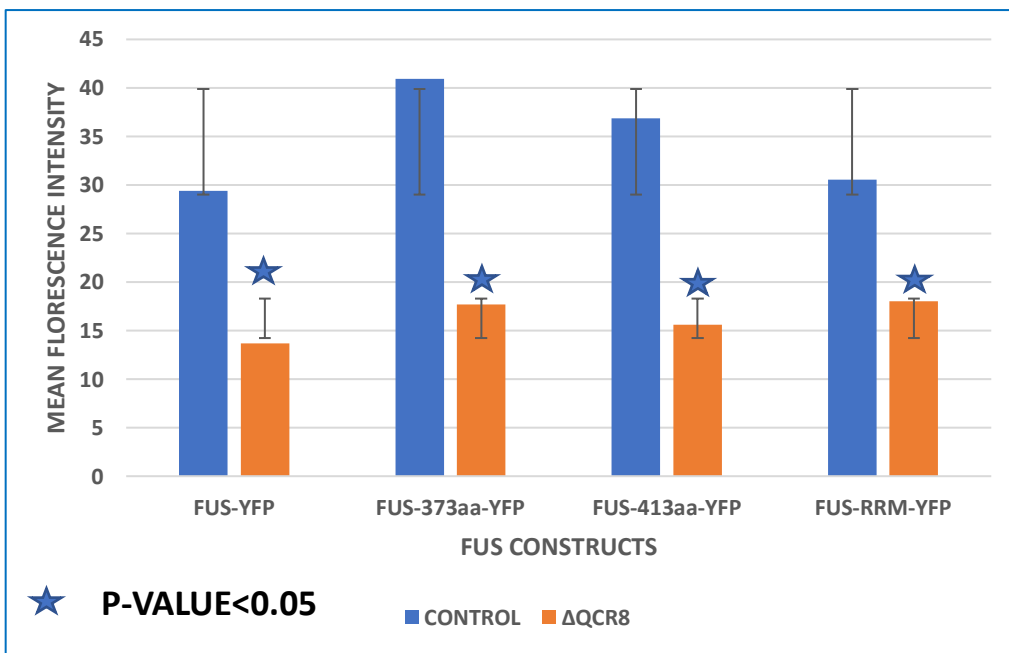

| CONDITION | FUS-YFP                    |                        | FUS-373aa-YFP              |                        | FUS-413aa-YFP              |                        | FUS-RRM-YFP                |                        |
|-----------|----------------------------|------------------------|----------------------------|------------------------|----------------------------|------------------------|----------------------------|------------------------|
|           | MEAN FLORESCENCE INTENSITY | SIGNIFICANCE (P-VALUE) |
| CONTROL   | 29.37490776                |                        | 40.92742736                |                        | 36.8824770                 |                        | 30.5248526                 |                        |
| ΔQCR8     | 13.70909795                | 0.00124564             | 17.7049148                 | 1.42025E-05            | 15.6181715                 | 2.43201E-05            | 18.0381337                 | 0.00051122             |

**SUPPLEMENTARY FIGURE-2E:** GRAPHS REPRESENTING RESULTS OBTAINED FROM FLORESCENCE QUANTIFICATION OF FUS TRANSFORMED YEAST KNOCK-OUTS OF COX8 AND QCR8.
